# Supplementary material for: Asymmetric nickel hollow fibres as the catalytic membrane reactor for CO2 hydrogenation into syngas
Source: Royal Society of Chemistry journal article supplement (doi:10.1039/c9cc00082h), 2019-01-01
Supplement: c9cc00082h1.pdf [file c9cc00082h1.pdf]

Electronic Supplementary Information (ESI) for

**Asymmetric nickel hollow fibres as the catalytic membrane reactor for CO<sub>2</sub>  
hydrogenation into syngas**

Mingming Wang<sup>a</sup>, Xiaoyao Tan<sup>a,\*</sup>, Xiaobin Wang<sup>b</sup>, Bo Meng<sup>b</sup> and Shaomin Liu<sup>c</sup>

**1. Experimental details**

***1.1 Preparation of the asymmetric Ni hollow fibers***

The Ni hollow fibers were fabricated by a modified spinning-sintering technique [1]. A spinning slurry was firstly prepared by dispersing the Ni powder uniformly in the polysulfone (PSf) solution with N-methyl-2-pyrrolidone (NMP) as the solvent. The composition of the spinning slurry was 62.25 wt% Ni powder, 12.5 wt% PSf, and 25 wt% NMP. After degassing, the spinning solution was pressurized with 0.15 MPa N<sub>2</sub> gas through a spinneret with the orifice/needle tube diameter of 3.0/1.5 mm into a tap water, using a 90wt% NMP aqueous solution as the bore liquid, to form hollow fibre precursors. The hollow fiber precursors were sintered at 1200 °C for 3 h under a 50 mol% H<sub>2</sub>-N<sub>2</sub> atmosphere to form dense metallic membranes.

***1.2 H<sub>2</sub> permeation and RWGS reaction measurement***

The H<sub>2</sub> permeation property and the RWGS reaction performance of the Ni hollow fibers were measured using a membrane module schematically described elsewhere [2]. The Ni hollow fibers were connected to two quartz tubes on both ends, where a high-temperature silicone sealant that is able to withstand up to 350 °C was used to seal the joints. It was then housed in a Φ10×400 mm quartz tube with two PTFE vessel covers on both ends. A tubular furnace of 23 cm in overall length was used for heating so that the sealing points were kept out of the hot zone of the furnace. The effective heating length of the furnace was 5 cm. For H<sub>2</sub> permeation measurement, a H<sub>2</sub>-He mixture was fed into the shell side while N<sub>2</sub> as the sweep gas was passed co-currently through the lumen side to collect the permeated hydrogen. The gas feed flow rates were controlled with the gas mass flow controllers. A soap bubble flow meter was used to measure the flow rates of the permeate and the retentate gas. Gas compositions were

measured online using a gas chromatograph (Agilent 6890N) fitted with a 5 Å molecular sieve column (3 mm diameter and 3 m length) and a TCD detector. High-purity Ar with the flow rate of 20 cm<sup>3</sup> min<sup>-1</sup> was used as the carrier gas. The overall H<sub>2</sub> permeation flux was calculated by Eq. (1),

$$J_{H_2, overall}^e = \frac{F_{in}(x_f - x_e)}{A_m(1 - x_e)} \quad (1)$$

or

$$J_{H_2, overall}^e = \frac{F_{out}y_e}{A_m} \quad (2)$$

where  $F_s$ ,  $F_{in}$  and  $F_{out}$  are flow rates of the H<sub>2</sub>-He mixture, the CO<sub>2</sub> feed and the syngas product, respectively;  $A_m$  is the membrane permeation area calculated by  $A_m = \pi(D_o - D_{in})L / \ln(D_o / D_{in})$ , in which  $D_o$ ,  $D_{in}$  and  $L$  are the outer diameter, inner diameter and the effective fiber length for H<sub>2</sub> permeation, respectively;  $x_f$  and  $x_e$  are the H<sub>2</sub> concentrations (mol%) in the feed and the retentate, respectively; and  $y_e$  is the CO<sub>2</sub> or the CO concentration (%) in the syngas stream.

For the RWGS reaction experiment, CO<sub>2</sub> instead of N<sub>2</sub> as the sweep gas was introduced into the fiber lumen. A cold trap was used to condense the water vapor of the product gas before entering the GC. The CO<sub>2</sub> conversion was calculated by,

$$X_{CO_2} = \left(1 - \frac{F_{out}y_{CO_2}}{F_{in}}\right) \times 100\% \quad (3)$$

where  $y$  is the CO<sub>2</sub> or the CO concentration (%) in the syngas stream.

### **1.3 Characterization**

Morphology and microstructure of the hollow fiber membranes were observed with scanning electron microscopy (SEM) on HITACHI S-4800 (Japan). The gas-tight property of the hollow fiber membranes was confirmed by the nitrogen gas permeation test at room temperature [3]. The porosity of the hollow fibers was measured by the Archimedes method with distilled water as the liquid medium. The samples were immersed in the distilled water tank with ultrasonic for 5 min so that all the open pores were filled with water. The porosity was calculated according

to  $\varepsilon = 1 - \rho_{App} / \rho_{XRD}$ , where  $\rho_{App}$  is the measured apparent density of the Ni hollow fibers and  $\rho_{XRD}$  is the theoretical density of the metallic nickel. The N<sub>2</sub> adsorption-desorption isotherms of the hollow fiber were measured in the pressure range up to 1 atm at 77 K. Before measurements, every sample was degassed at 383 K for 6 h under vacuum.

### References

- [1] X. Tan, N. Liu and B. Meng, J Membr Sci, 2011 ,**378**, 308.  
 [2] M. Wang, J. Song and X. Wu, J Membr Sci, 2016 ,**509**, 156.  
 [3] X. Tan, Y. Liu and K. Li, AIChE J, 2005,**51**,1991.

## 2. Model of the hydrogen permeation through asymmetric Ni hollow fiber membrane

Considering that the H<sub>2</sub> partial pressures on both the shell and the lumen sides vary along the hollow fiber due to the permeation, the permeability of the asymmetric hollow fiber membranes has to be analyzed with the permeation model related to local permeation flux. Figure S1 shows the flowing pattern for H<sub>2</sub> permeation in the asymmetric hollow fiber. A model is established as follows to describe the permeation process based on the assumptions: 1) isothermal and isobaric operation. 2) plug flow for both the feed and the sweep gas; 4) negligible external mass transfer resistance; 5) ideal gas behavior.

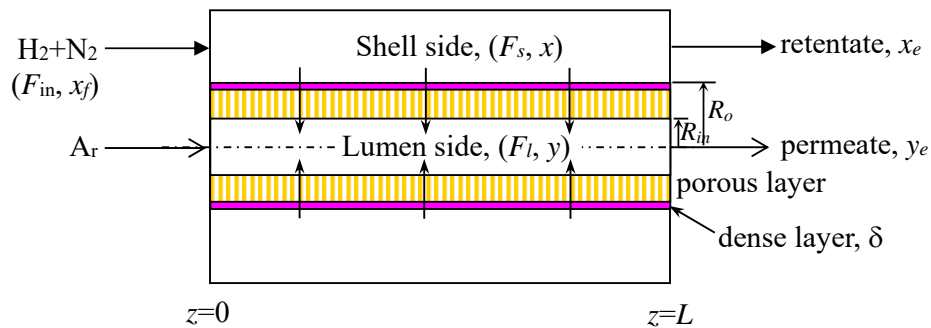

**Figure S1** Flowing pattern of the H<sub>2</sub> permeation in the asymmetric hollow fiber membrane

The mass conservation equations for the shell and the lumen gas phases can be written as,

$$\text{H}_2 \text{ in shell side: } \frac{d}{dz} (F_s, x) = -2\pi R_m \cdot J_{H_2} \quad (4)$$

$$\text{N}_2 \text{ in shell side: } F_s(1-x) = F_{in}(1-x_f) \quad (5)$$

$$\text{H}_2 \text{ in lumen side: } \frac{d}{dz}(F_l y) = 2\pi R_m \cdot J_{\text{H}_2} \quad (6)$$

$$\text{Ar in lumen side: } F_l(1-y) = F_{Ar} \quad (7)$$

The boundary conditions for Eqs (4-5) are given by,

$$z = 0, \quad x = x_f, \quad y = 0 \quad (8)$$

In the above governing equations,  $F_s$  and  $F_l$  ( $\text{mol s}^{-1}$ ) are the molar flow rate of the shell and lumen phase, respectively;  $x$  and  $y$  are the molar fraction of  $\text{H}_2$  in the shell and lumen phase;  $R_m$

is the logarithmic mean radius of the hollow fiber calculated by  $R_m = \frac{R_o - R_{in}}{\ln(R_o / R_{in})}$ ;  $F_{in}$  and  $F_{Ar}$

( $\text{mol s}^{-1}$ ) are the feed flow rates of the  $\text{H}_2$ - $\text{N}_2$  mixture and the Ar sweep gas, respectively. The local  $\text{H}_2$  permeation flux in  $\text{mol m}^{-2} \text{ s}^{-1}$  can be expressed by the Sieverts' equation [8],

$$J_{\text{H}_2} = Q \cdot ((p_a x)^{0.5} - (p_a y)^{0.5}) \quad (9)$$

where  $p_a$  is the atmospheric pressure ( $1.013 \times 10^5 \text{ Pa}$ ), and  $Q$  is the  $\text{H}_2$  permeance through the membrane ( $\text{mol m}^{-2} \text{ s}^{-1} \text{ Pa}^{-0.5}$ ), which is a function of temperature and membrane thickness expressed by,

$$Q = \frac{P_{H0} \exp(-E_a / RT)}{\delta} \quad (10)$$

where  $P_{H0}$  is the pre-exponential factor of  $\text{H}_2$  permeability ( $\text{mol m}^{-1} \text{ s}^{-1} \text{ Pa}^{-0.5}$ );  $E_a$  the activation energy ( $\text{J mol}^{-1}$ );  $R$  the ideal gas constant ( $8.314 \text{ J mol}^{-1} \text{ K}^{-1}$ ),  $T$  the permeation temperature (K), and  $\delta$  is the effective membrane thickness (m).

### 3. SEM images of the Ni hollow fiber precursor

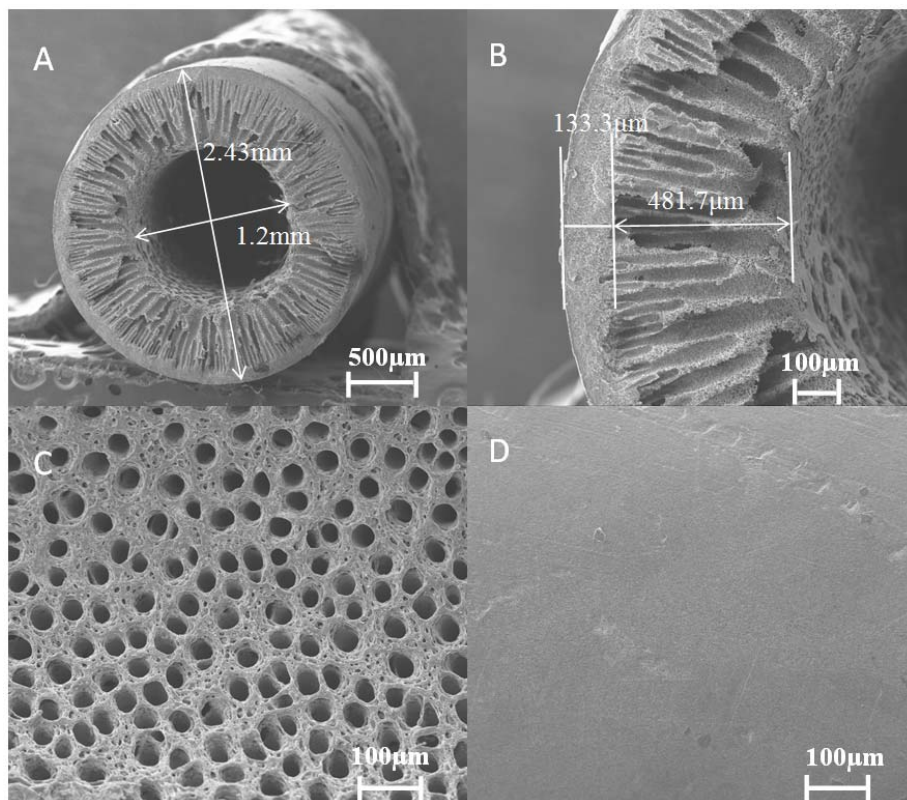

**Figure S2** SEM images of the Ni hollow fiber precursor: A-cross section; B-wall; C-inside surface; D-outside surface

#### 4. The Arrhenius plot of the H<sub>2</sub> permeance of the hollow fibre

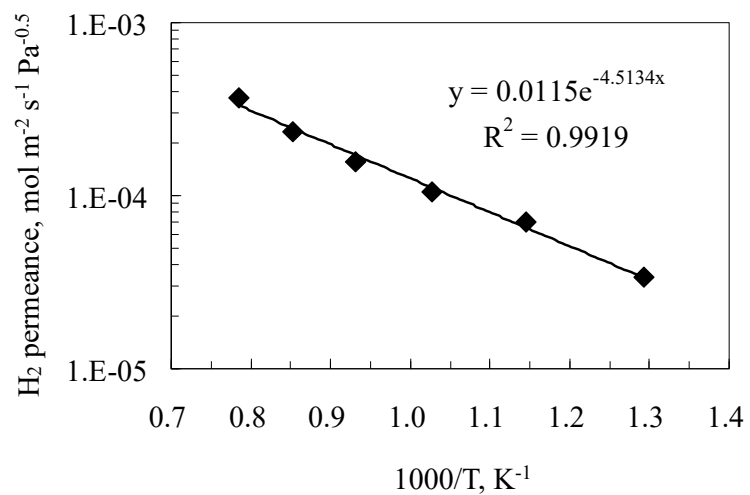

**Figure S3** Arrhenius plot of the H<sub>2</sub> permeance of the asymmetric hollow fiber against temperature

### 5. Effects of CO<sub>2</sub> flow rate

At higher gas flow rates, the contact time of gases with the membrane reactor would be shortened, significantly influencing the RWGS. The effect of the sweep gas on the membrane reactor performance during the RWGS reaction was investigated. Fig.S4 shows the H<sub>2</sub> flux, CO<sub>2</sub> conversion, CO yield, and syngas composition as a function of temperature under different CO<sub>2</sub> feed flow rate. The feed flow rate of 50% H<sub>2</sub>-N<sub>2</sub> mixture was fixed at  $2.23 \times 10^{-5}$  mol s<sup>-1</sup>. Figure S4 (a) shows the H<sub>2</sub> permeation flux as a function of temperatures at different CO<sub>2</sub> sweeping rate. Just as expected, the H<sub>2</sub> permeation flux increased with increasing the temperature and CO<sub>2</sub> sweeping rate. Higher CO<sub>2</sub> flowrates consume more H<sub>2</sub> thus expanding the driving force for H<sub>2</sub> permeation. It is quite logic to observe that CO<sub>2</sub> conversion and CO yield decreased with the sweep gas flow rate increment at a given temperature (Figure S4(b)) as the residence time decreases with the higher gas hourly space velocity (GHSV). For example, at 1000 °C, as the CO<sub>2</sub> sweeping rate decreased from  $3.35 \times 10^{-5}$  to  $1.12 \times 10^{-5}$  mol s<sup>-1</sup>, the CO yield increased from 20.53% to 38.21% and the CO<sub>2</sub> conversion increased from 23.11% to 39.63%. Given the experimental error range, the carbon is well balanced before and after going through the hollow fiber. Fig. S4(c) presents the H<sub>2</sub> and CO concentrations in the CO<sub>2</sub> sweep side as a function of CO<sub>2</sub> flow rate. It is clearly seen that both H<sub>2</sub> and CO concentrations increased with decreasing the CO<sub>2</sub> flow rate and H<sub>2</sub> concentration is lower than CO concentration.

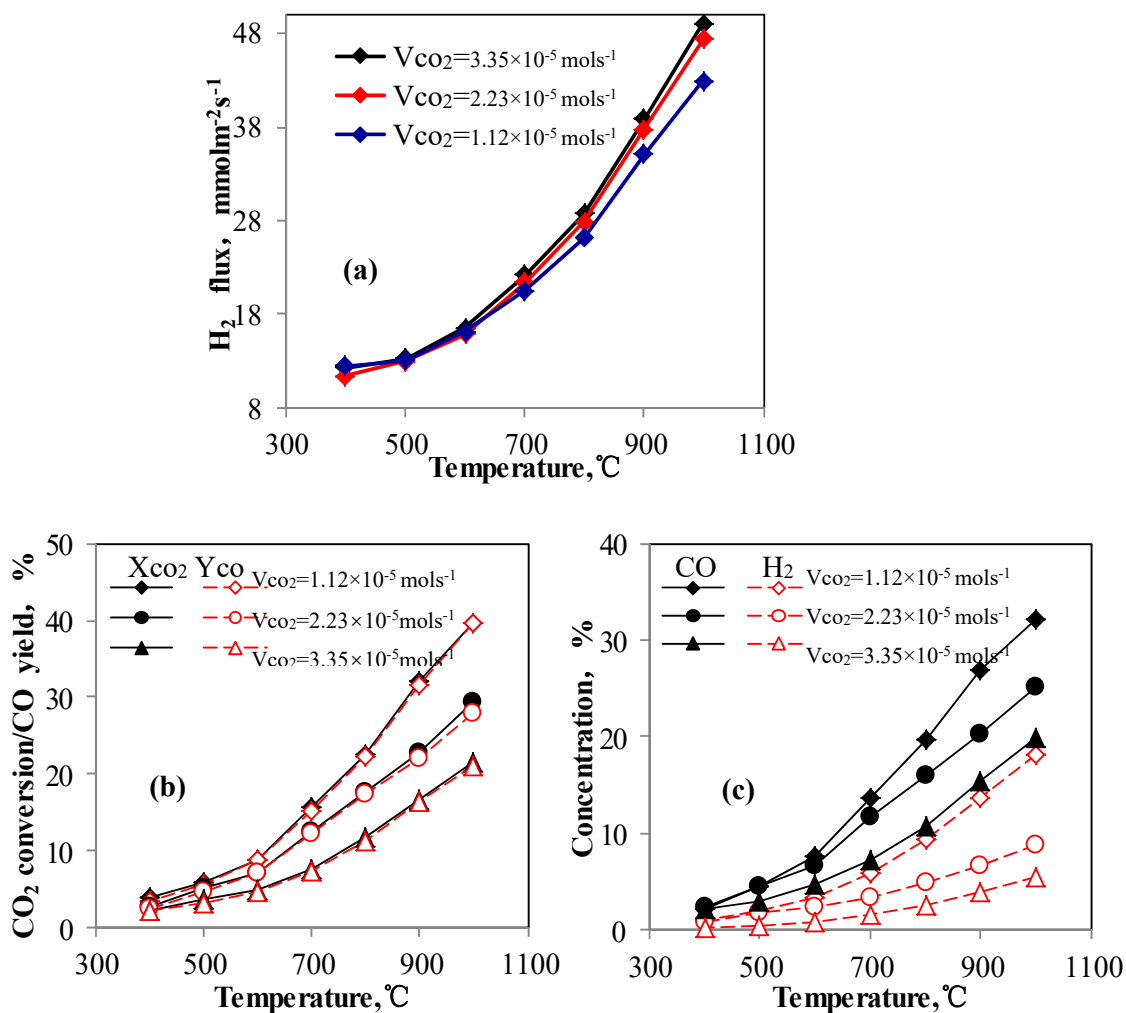

**Figure S4** Effects of CO<sub>2</sub> flow rate on (a) H<sub>2</sub> flux; (b) CO<sub>2</sub> conversion and CO yield and (c) H<sub>2</sub> and CO concentrations in sweep side as a function of temperature (H<sub>2</sub>-N<sub>2</sub> feed flow rate:  $2.23 \times 10^{-5} \text{ mol} \cdot \text{s}^{-1}$ ).

## 6. Stability test of the Ni hollow fiber membrane

The stability of the Ni hollow fiber membrane was tested for 80 h at 900 °C using 50% H<sub>2</sub> as feed and CO<sub>2</sub> as the sweep gas. The CO<sub>2</sub> conversion and H<sub>2</sub> permeation rate were shown in Figure S5(a). It can be seen that the CO<sub>2</sub> conversion and H<sub>2</sub> permeation rate remained stable during the reaction test of 80 hours, the Ni hollow fibre showing a good thermal stability and resistance to carbon deposition. Figure S5(b) shows the inner surface of the hollow fibre after the reaction and permeation test. It is well known that Ni-based catalysts have a high

thermodynamic potential for coke formation. However, no obvious coke formation was observed on the membrane inner surface (reaction side) and inside the pores (Fig. S5(b1-b2)) after long term stability test. The carbon balances of the feed gas before and after the permeation tests between 500-1000°C were performed to evaluate the possible carbon deposition on the membrane surface. We found that the calculated difference of the overall carbon content from CO and CO<sub>2</sub> in the effluent from the feed was only between 0.11-2%. Given the experimental error range, the carbon is well balanced before and after going through the hollow fiber.

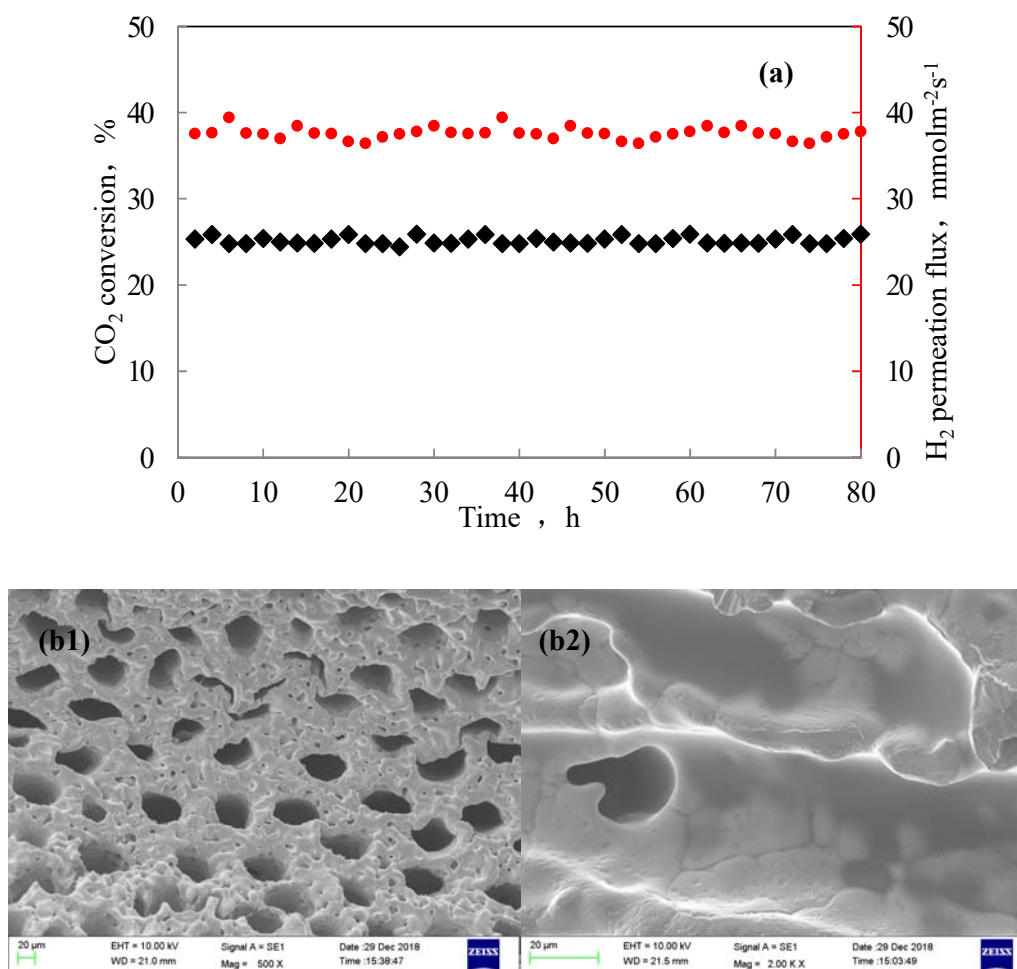

**Figure S5 (a)** CO<sub>2</sub> conversion and H<sub>2</sub> permeation flux for 80-hour test at 900 °C (H<sub>2</sub>-N<sub>2</sub> feed flow rate of  $2.23 \times 10^{-5} \text{ mol s}^{-1}$ ; CO<sub>2</sub> feed flow rate of  $.24 \times 10^{-5} \text{ mol s}^{-1}$ ) **(b)** SEM images of the inner surface (feed side) (b1-inner surface; b2-finger hole) after the long term test.
